# The dynamics of plasma membrane PtdIns(4,5) $P_2$ at fertilization of mouse eggs

Guillaume Halet<sup>1</sup>, Richard Tunwell<sup>1,2</sup>, Tamas Balla<sup>3</sup>, Karl Swann<sup>2</sup> and John Carroll<sup>1,\*</sup>

<sup>1</sup>Department of Physiology and <sup>2</sup>Department of Anatomy and Developmental Biology, University College London, Gower Street, London WC1E 6BT, UK

<sup>3</sup>Endocrinology and Reproduction Research Branch, National Institutes of Health, Bethesda, MD 20892, USA

\*Author for correspondence (e-mail: j.carroll@ucl.ac.uk)

Accepted 5 March 2002

Journal of Cell Science 115, 2139-2149 (2002) © The Company of Biologists Ltd

## Summary

A series of intracellular  $Ca^{2+}$  oscillations are responsible for triggering egg activation and cortical granule exocytosis at fertilization in mammals. These  $Ca^{2+}$  oscillations are generated by an increase in inositol 1,4,5-trisphosphate [Ins(1,4,5) $P_3$ ], which results from the hydrolysis of phosphatidylinositol 4,5-bisphosphate [PtdIns(4,5) $P_2$ ]. Using confocal imaging to simultaneously monitor  $Ca^{2+}$  and plasma membrane PtdIns(4,5) $P_2$  in single living mouse eggs we have sought to establish the relationship between the kinetics of PtdIns(4,5) $P_2$  metabolism and the  $Ca^{2+}$  oscillations at fertilization. We report that there is no detectable net loss of plasma membrane PtdIns(4,5) $P_2$  either during the latent period or during the subsequent  $Ca^{2+}$  oscillations. When phosphatidylinositol 4-kinase is inhibited with micromolar wortmannin a limited decrease in plasma membrane PtdIns(4,5) $P_2$  is detected in half the eggs studied. Although we were unable to detect a widespread loss of PtdIns(4,5) $P_2$ , we found that fertilization

triggers a net increase in plasma membrane PtdIns(4,5) $P_2$  that is localized to the vegetal cortex. The fertilization-induced increase in PtdIns(4,5) $P_2$  follows the increase in  $Ca^{2+}$ , is blocked by  $Ca^{2+}$  buffers and can be mimicked, albeit with slower kinetics, by photoreleasing Ins(1,4,5) $P_3$ . Inhibition of  $Ca^{2+}$ -dependent exocytosis of cortical granules, without interfering with  $Ca^{2+}$  transients, inhibits the PtdIns(4,5) $P_2$  increase. The increase appears to be due to de novo synthesis since it is inhibited by micromolar wortmannin. Finally, there is no increase in PtdIns(4,5) $P_2$  in immature oocytes that are not competent to extrude cortical granules. These studies suggest that fertilization does not deplete plasma membrane PtdIns(4,5) $P_2$  and that one of the pathways for increasing PtdIns(4,5) $P_2$  at fertilization is invoked by exocytosis of cortical granules.

Key words: Phosphatidylinositol 4,5-bisphosphate, Oocyte, GFP

## Introduction

At fertilization in mammals, the sperm triggers a series of low-frequency cytosolic  $Ca^{2+}$  oscillations that continue for several hours (Cuthbertson and Cobbold, 1985; Kline and Kline, 1992). This  $Ca^{2+}$  signal is responsible for the exocytosis of cortical granules, resumption of meiosis and activation of development (Kline and Kline, 1992; Miyazaki et al., 1993; Xu et al., 1994; Abbott and Ducibella, 2001). In mammals, the main intracellular  $Ca^{2+}$  channel involved in  $Ca^{2+}$  release at fertilization is the type I Ins(1,4,5) $P_3$ -receptor [Ins(1,4,5) $P_3R$ ]. It is present far in excess of the other isoforms (Jellerette et al., 2000; Brind et al., 2000) and injection of functionally inhibitory antibodies or downregulation of the receptor during maturation, both lead to an inhibition of fertilization-induced  $Ca^{2+}$  transients (Miyazaki et al., 1993; Brind et al., 2000). Thus,  $Ca^{2+}$  release and egg activation at fertilization is triggered by Ins(1,4,5) $P_3$  production.

Ins(1,4,5) $P_3$  is generated via phospholipase C (PLC)-mediated hydrolysis of PtdIns(4,5) $P_2$  (Berridge, 1993). The mechanism of PLC activation at fertilization is an active area of research and two main models are emerging in which either sperm-derived PLCs (mammals) or egg-derived PLCs (sea urchins/starfish) are activated (for reviews, see Stricker, 1999; Jaffe et al., 2001; Carroll, 2001). In mammals, PLC activation

and the resultant PtdIns(4,5) $P_2$  hydrolysis and Ins(1,4,5) $P_3$  production must persist for several hours to support the generation of long-lasting  $Ca^{2+}$  oscillations. Studies in somatic cells suggest that the dynamics of PtdIns(4,5) $P_2$  hydrolysis and Ins(1,4,5) $P_3$  production that are required to bring about  $Ca^{2+}$  oscillations involve a pulsatile generation of Ins(1,4,5) $P_3$  that initiates each  $Ca^{2+}$  spike (Meyer and Stryer, 1988; Harootunian et al., 1991; Hirose et al., 1999; Nash et al., 2001) or a persistent low level of activation that sensitizes the Ins(1,4,5) $P_3R$  to  $Ca^{2+}$ -induced  $Ca^{2+}$  release (Wakui et al., 1989; Missiaen et al., 1991; Berridge, 1993). In mouse eggs, the finding that non-hydrolysable Ins(1,4,5) $P_3$  analogues (Sato et al., 1998) and low persistent levels of Ins(1,4,5) $P_3$  (Jones and Nixon, 2000) can cause repetitive  $Ca^{2+}$  oscillations provides some support for the latter of these two models.

To date, Ins(1,4,5) $P_3$  and PtdIns(4,5) $P_2$  have been measured at fertilization in large populations of sea urchin and *Xenopus* eggs using biochemical mass assays. These studies have revealed that both Ins(1,4,5) $P_3$  and its precursor PtdIns(4,5) $P_2$  increase at the time of fertilization (Turner et al., 1984; Ciapa et al., 1992; Stith et al., 1993; Stith et al., 1994; Snow et al., 1996). This apparently counterintuitive result is explained by the increase in PtdIns(4,5) $P_2$  being a small difference in a very large increase in the turnover of polyphosphoinositides (PPI)

(Ciapa et al., 1992). Although these biochemical studies provide insightful snapshots into the metabolism of PPI at fertilization in sea urchins, it is not known precisely when PtdIns(4,5) $P_2$  changes start in relation to the  $Ca^{2+}$  wave or whether a similar large increase in PPI turnover is necessary to drive long-lasting  $Ca^{2+}$  oscillations in mammals.

In addition to PtdIns(4,5) $P_2$  providing a source of Ins(1,4,5) $P_3$  for the release of  $Ca^{2+}$ , recent evidence suggests that PtdIns(4,5) $P_2$  is also required during exocytosis. In this role PtdIns(4,5) $P_2$  acts as a signaling molecule, rather than as a substrate for an enzyme, that can interact directly with target proteins containing PtdIns(4,5) $P_2$ -binding motifs. Acting in this mode, it has been proposed that PtdIns(4,5) $P_2$  is involved in a number of steps in  $Ca^{2+}$ -dependent exocytosis, including vesicle docking, priming, fusion, actin remodeling and subsequent endocytosis (Martin, 1998; Martin, 2001; Cremona and De Camilli, 2001). Presumably, PtdIns(4,5) $P_2$  also plays a role in the  $Ca^{2+}$ -dependent exocytosis of cortical granules that is stimulated at fertilization (Xu et al., 1994; Abbott and Ducibella, 2001). As such, PtdIns(4,5) $P_2$  is required to play multiple roles at fertilization. First, it is required for hydrolysis in order to supply Ins(1,4,5) $P_3$  and, as a consequence of the Ins(1,4,5) $P_3$ -induced  $Ca^{2+}$  release, it is required in a signaling role to participate in the exocytosis of cortical granules. Clearly a tight regulation of PtdIns(4,5) $P_2$  is required at fertilization if it is to perform these dual, and competing roles.

Recently, it has become possible to monitor PtdIns(4,5) $P_2$  in living cells using a GFP-fusion protein (Stauffer et al., 1998; Varnai and Balla, 1998). The indicator consists of the pleckstrin homology (PH) domain of PLC $\delta$ 1 coupled to GFP (PH-GFP). The PH domain has a high affinity for PtdIns(4,5) $P_2$  and localises to the plasma membrane, consistent with the known distribution of PtdIns(4,5) $P_2$  in mammalian cells (Lemmon et al., 1995; Kavran et al., 1998; Balla et al., 2000). The fusion protein provides a dynamic measure of PtdIns(4,5) $P_2$  since activation of PLC and hydrolysis of PtdIns(4,5) $P_2$  leads to a redistribution of PH-GFP from the plasma membrane to the cytosol (Stauffer et al., 1998; Varnai and Balla, 1998; van der Wal et al., 2001). In some cell types, high levels of Ins(1,4,5) $P_3$ , which also has a high affinity for PH-GFP, can compete with PtdIns(4,5) $P_2$  for PH-GFP (Hirose et al., 1999; Nash et al., 2001). As such there is some controversy as to whether PH-GFP reports PtdIns(4,5) $P_2$  or Ins(1,4,5) $P_3$  (van der Wal et al., 2001). In this study, we use PH-GFP to report plasma membrane PtdIns(4,5) $P_2$  in mouse eggs at the time of fertilization. We found no evidence for significant loss of plasma membrane PtdIns(4,5) $P_2$ , rather a net increase that is dependent on exocytosis of cortical granules.

## Materials and Methods

### Gametes collection and fertilization

Immature germinal vesicle-stage (GV) oocytes and mature metaphase II-arrested (MII) oocytes were recovered from hormone-primed MF1 mice and stored in M2 medium (Fulton and Whittingham, 1978) as previously described (Brind et al., 2000). Sperm from the epididymis of proven MF1 mice was released in 1 ml of T6 (Quinn et al., 1982) and allowed to disperse for 20 minutes before diluting in a total of 5 ml of the same medium for capacitation. For in vitro fertilization, the zona pellucida was removed by a short incubation in acidic Tyrode's at 37°C. Zona-free oocytes were

fertilized on the stage of the confocal microscope by adding 20  $\mu$ l of the sperm suspension into the incubation chamber. All experiments were conducted in M2 at 37°C.

### DNA construct and cRNA microinjection

The chimera encoding the PH domain of PLC $\delta$ 1 fused to enhanced green fluorescent protein (PH-GFP) was constructed as described previously (Varnai and Balla, 1998), and cloned into pcDNA3.1, which contains a T7 primer enabling cRNA synthesis. Plasmids were linearised after the 3'UTR with *Sma*I and in vitro transcription was performed with T7 polymerase (Promega) according to the manufacturer's protocol. The cRNA was purified by RNeasy column (Qiagen) and polyadenylated as described previously (Subramanian and Meyer, 1997). The polyadenylated cRNA was recovered by RNeasy column in RNase-free water, aliquoted and stored at -80°C. cRNA was diluted in injection buffer (120 mM KCl, 20 mM Hepes, pH 7.4) to a final concentration of 0.1-0.2  $\mu$ g/ $\mu$ l, and microinjected (estimated 2-5% of egg volume) using pressure-injection. Imaging was started 2-3 hours after cRNA injection. Some oocytes were injected with a cRNA encoding the same fusion-protein, carrying a point mutation (R40L) in the PH domain on one critical basic residue involved in PtdIns(4,5) $P_2$  binding (Varnai and Balla, 1998).

### Manipulation and treatment of oocytes

For [ $Ca^{2+}$ ]<sub>i</sub> measurements, oocytes were incubated in M2 containing 10  $\mu$ M fura-red-AM (Molecular Probes) at 37°C for 15 minutes. In wortmannin experiments, oocytes were preincubated with 30  $\mu$ M wortmannin (Calbiochem) for 15 minutes. This rather high concentration was used in order to fully block type III phosphatidylinositol 4-kinase (PtdIns 4-kinase) activity in vivo using a short incubation time, and considering that oocytes have a relatively low surface area/volume ratio compared with somatic cells. For BAPTA experiments, oocytes were preincubated with 1 or 10  $\mu$ M BAPTA-AM (Molecular Probes) at 37°C for 15 minutes. Since 10  $\mu$ M BAPTA-AM abolished  $Ca^{2+}$  oscillations, fertilization was confirmed at the end of the experiments by staining chromatin with Hoechst 33342 (see below). For jasplakinolide experiments, oocytes were preincubated with 100 nM Jasplakinolide (Molecular Probes) for 30-60 minutes. During the recordings, Jasplakinolide was continuously present in the experimental chamber at the optimal final concentration of 100 nM (Terada et al., 2000). For caged-Ins(1,4,5) $P_3$  experiments, oocytes expressing PH-GFP were further injected with NPE-caged Ins(1,4,5) $P_3$  (Molecular Probes; 1 mM pipette concentration) 30 minutes prior to the imaging (see below). Injections were 2-5% of egg volume (based on cytoplasmic displacement) giving an estimated final concentration in the range of 20-50  $\mu$ M. Some oocytes expressing PH-GFP were also injected with the catalytically active light chain of Botulinum neurotoxin A (BoNT/A-LC, 5  $\mu$ M in the pipette). The final concentration of BoNT/A in the eggs is 100-250 nM, based on the injection volume described above. BoNT/A-LC was kindly provided by G. Schiavo (Imperial Cancer Research Fund, London, UK).

### Confocal imaging and Ins(1,4,5) $P_3$ uncaging

Zona-free oocytes were transferred to an experimental chamber seated in a heating stage and were observed with a Zeiss LSM-510 laser-scanning microscope (Carl Zeiss Inc.) with a 20 $\times$  (0.75 NA) objective. In fertilization experiments, confocal images were taken at 7 or 10 second intervals, as soon as one sperm remained bound to the oocyte. Transmitted light images, GFP and fura-red fluorescence images were acquired through the equator of the oocyte, using the 488 nm line of an argon laser. GFP fluorescence from the PH-GFP fusion protein was recorded through a BP505-530 emission filter. Fura-red fluorescence and GFP were monitored in the same confocal slice, using a

LP650 emission filter. For caged-Ins(1,4,5) $P_3$  experiments, oocytes were scanned simultaneously with the 488 nm line of the Argon laser and the 364 nm line of a UV laser (1.5 mW). The intensity of UV illumination was adjusted by setting the acusto-optical tunable filter (AOTF) to 0.5 or 5% excitation, in order to photolyse low and high amounts of caged-Ins(1,4,5) $P_3$ , respectively. For all experiments, the 488 nm laser power and pin-hole size were kept the same (confocal slices were 3.5  $\mu\text{m}$  thick). For DNA staining, oocytes were incubated with 1  $\mu\text{g}/\text{ml}$  Hoechst 33342 for 15 minutes and images of the chromosomes were acquired with UV laser scanning.

#### Confocal data analysis

Confocal images were analyzed using Metamorph (Universal Imaging). Plasma membrane and cytoplasmic GFP fluorescence were measured by drawing regions around the egg's perimeter and in the cytoplasm, respectively, and expressed as arbitrary units. Fura-red fluorescence was measured in a cytoplasmic circular region. The same regions were used for each individual frame of an image series. Calculation of the ratio of membrane to cytosolic GFP fluorescence and graphs displaying GFP or Fura-red fluorescence along time, were obtained with Microsoft Excel 2000. Since Fura-red fluorescence decreases when  $[\text{Ca}^{2+}]_i$  rises, changes in  $[\text{Ca}^{2+}]_i$  were expressed as the negative value of the change in Fura-red fluorescence relative to baseline fluorescence ( $\Delta F/F$ ), to obtain positive values for measurements of amplitude and rate of rise.

#### Assay for exocytosis of cortical granules

Cortical granule exocytosis was detected on living eggs by the fluorescent lectin-staining method (Lee et al., 1988). Zona-free oocytes were fertilized in M2 by incubation with sperm for 15 minutes at 37°C, then washed and left in M2 for 20 minutes. Fertilized eggs were incubated with FITC- or TRITC-conjugated *Lens culinaris* agglutinin (FITC/TRITC-LCA) for 3 minutes. Eggs were then washed three times in M2 with gentle pipetting, and the pattern of FITC/TRITC-LCA staining was observed by fluorescence microscopy using a fluorescein or rhodamine filter set and a 40 $\times$  objective. Images were acquired with a CCD camera (Princeton) and analyzed with Metafluor (Universal Imaging). Eggs displaying the typical punctate staining pattern on their surface were considered to have released their cortical granules.

## Results

### Expression of PH-GFP in mouse eggs

To monitor PtdIns(4,5) $P_2$  in mouse eggs we expressed a fusion protein of the pleckstrin homology (PH) domain of PLC $\delta$ 1 and green fluorescent protein (PH-GFP). PH-GFP has been used previously to monitor the dynamics of PtdIns(4,5) $P_2$  or Ins(1,4,5) $P_3$  (Stauffer et al., 1998; Varnai and Balla, 1998; Hirose et al., 1999; Balla et al., 2000; van der Wal et al., 2001; Nash et al., 2001). PH-GFP exhibited a strong accumulation in

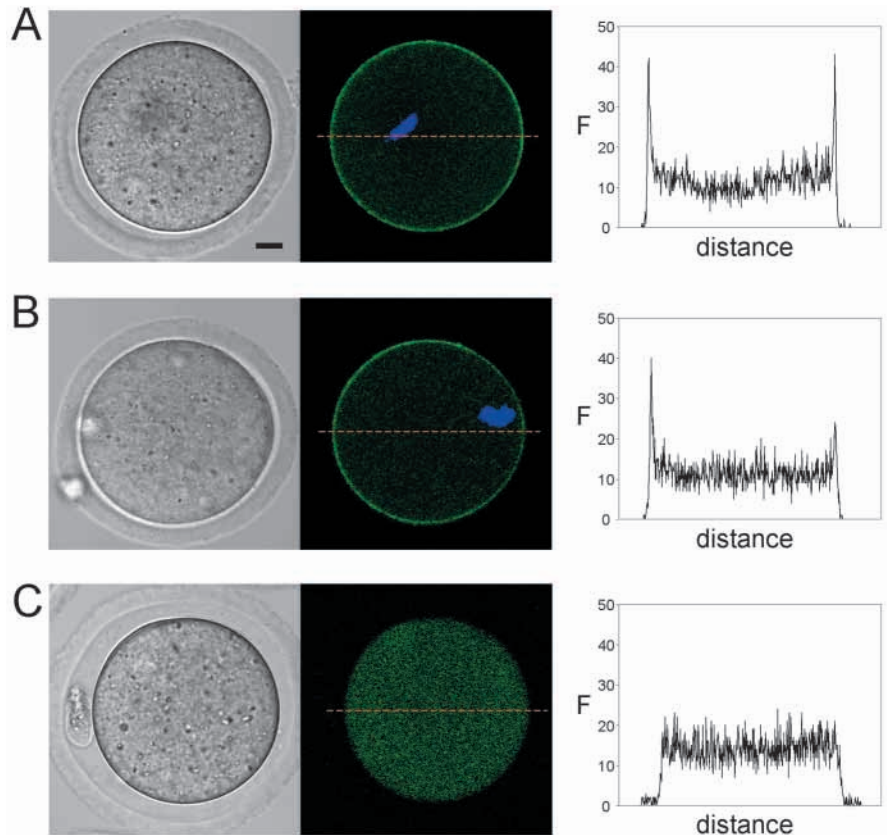

**Fig. 1.** PH-GFP binds to plasma membrane PtdIns(4,5) $P_2$  in mouse oocytes. Confocal images of GFP fluorescence in the equatorial plane of mouse MII oocytes, acquired 2–3 hours after injection with the cRNA encoding PH-GFP (A,B) or the mutant PH(R40L)-GFP, which does not bind to PtdIns(4,5) $P_2$  (C). Corresponding line intensity profiles are displayed on the right, with GFP fluorescence expressed as relative fluorescence units (F) and bright field images shown on the left. (A) MII oocyte with the animal pole out of focus (fluorescence from the chromosomes, stained with Hoechst 33342, was captured in a plane above and superimposed). (B) MII oocyte with the animal pole in the focal plane. Note the higher fluorescence intensity associated with the plasma membrane in the vegetal pole. (C) MII oocyte expressing PH(R40L)-GFP. For each condition, similar patterns of staining were obtained in at least 20 oocytes. Bar, 10  $\mu\text{m}$ .

the plasma membrane (PM), whereas cytoplasmic fluorescence (C) was low and homogeneous (Fig. 1A). A chimera carrying a point mutation preventing PtdIns(4,5) $P_2$  recognition by the PH domain (PH(R40L)-GFP) did not localize to the plasma membrane (Fig. 1C), which suggests that the cortical accumulation of PH-GFP reflects binding to plasma membrane PtdIns(4,5) $P_2$ . In addition, plasma membrane staining was enriched in the vegetal pole of the oocytes (Fig. 1B). This may result from a specific localization of the PtdIns(4,5) $P_2$  synthesis machinery and/or the presence of microvilli, which increase the plasma membrane area (Lee et al., 1988).

We next sought to verify that PH-GFP did not interfere with the early events of fertilization. Monitoring  $[\text{Ca}^{2+}]_i$  in PH-GFP-expressing eggs revealed that the fusion protein had no effect on the ability of the sperm to generate the typical series of  $\text{Ca}^{2+}$  transients (Fig. 2). In addition, exocytosis, as monitored by lectin staining, was similar in eggs expressing PH-GFP [87% labeled (13/15)] and in non-expressing controls [85% labeled (23/27)]. Thus,  $\text{Ca}^{2+}$  release and exocytosis proceeds normally in the presence of PH-GFP.

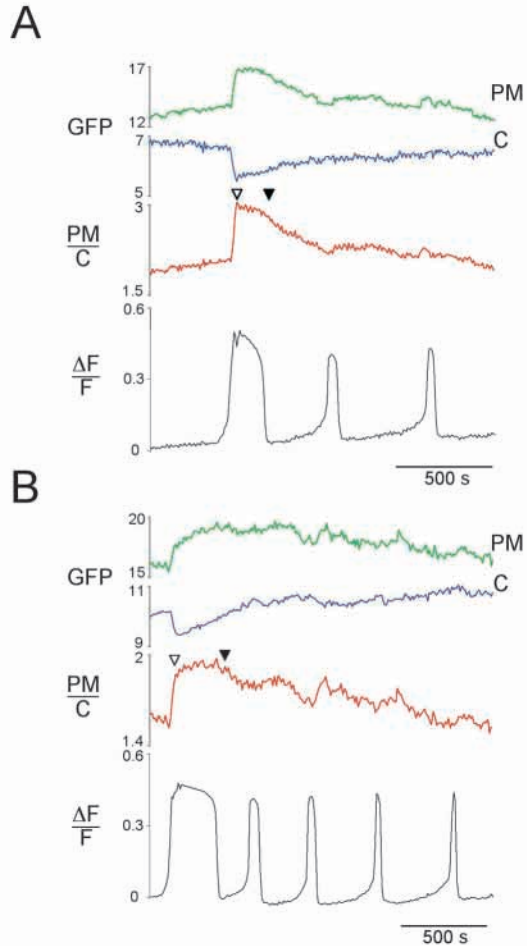

### Plasma membrane PtdIns(4,5)P<sub>2</sub> increases at fertilization

To examine PtdIns(4,5)P<sub>2</sub> dynamics at fertilization we monitored [Ca<sup>2+</sup>]<sub>i</sub> and PtdIns(4,5)P<sub>2</sub> simultaneously. At fertilization in mice there is a latent period of 1-3 minutes between the time of sperm-egg fusion and the initiation of the first Ca<sup>2+</sup> transient (Lawrence et al., 1997; Jones et al., 1998). Close examination of PtdIns(4,5)P<sub>2</sub> during the latent period did

**Fig. 2.** Plasma membrane PtdIns(4,5)P<sub>2</sub> increases at fertilization. MII oocytes were fertilized on the stage of the microscope and GFP fluorescence (in arbitrary units; PM, plasma membrane; C, cytoplasm) and Fura-red fluorescence (ΔF/F) were continuously recorded at a rate of 1 frame every 7 seconds (A) or 10 seconds (B). Note the translocation of PH-GFP from the cytoplasm to the plasma membrane. The increase in PM/C ratio indicates an increase in plasma membrane PtdIns(4,5)P<sub>2</sub>. The white and black arrowheads indicate the position for measurement of the peak change in PM/C and value of PM/C at the end of the first Ca<sup>2+</sup> transient, respectively. This data is displayed in Table 1 as the ΔPM/C(peak) and ΔPM/C(end) and used to compare the different properties of the increase in PtdIns(4,5)P<sub>2</sub>.

not reveal any detectable change in plasma membrane PtdIns(4,5)P<sub>2</sub> (Fig. 1). The first change in PtdIns(4,5)P<sub>2</sub> was stimulated within one minute of the first Ca<sup>2+</sup> transient and took the form of an increase in plasma membrane PH-GFP fluorescence and a concomitant decrease in the cytoplasm (Fig. 2A). This increase in the PM/C ratio reflects the recruitment of PH-GFP to the plasma membrane, which indicates an increase in PtdIns(4,5)P<sub>2</sub>. The recruitment of PH-GFP peaked 30 seconds after the first peak of [Ca<sup>2+</sup>]<sub>i</sub> and was sustained while [Ca<sup>2+</sup>]<sub>i</sub> remained elevated, before slowly returning to baseline (Fig. 2A; Table 1). There was often a second or third PtdIns(4,5)P<sub>2</sub> increase of a smaller amplitude associated with subsequent Ca<sup>2+</sup> transients. In some eggs with high frequency Ca<sup>2+</sup> oscillations, the increase in PtdIns(4,5)P<sub>2</sub> was sustained for up to 10 minutes (Fig. 2B). Therefore, the increase in PtdIns(4,5)P<sub>2</sub> showed a complex temporal pattern that was dependent on a short-lived mechanism that could be influenced by the frequency of Ca<sup>2+</sup> oscillations.

To examine the spatial organization of the increase in PtdIns(4,5)P<sub>2</sub>, confocal scans along the animal-vegetal axis were collected during fertilization and analyzed to determine the relative changes in PtdIns(4,5)P<sub>2</sub> in the plasma membrane of both poles. The fluorescence was lower in the animal pole at rest but there was no detectable increase at fertilization (Fig. 3A). By contrast, in the vegetal pole, a reliable increase in PtdIns(4,5)P<sub>2</sub> was stimulated (Fig. 3A,B). The increase was reasonably uniform throughout the confocal slice of the vegetal hemisphere suggesting that it was not due to a highly localized increase at the site of sperm-egg fusion (Fig. 3B). Thus,

**Table 1. Amplitude and kinetic parameters of the rises in [Ca<sup>2+</sup>]<sub>i</sub> and PtdIns(4,5)P<sub>2</sub> at fertilization**

|                               | [Ca <sup>2+</sup> ] <sub>i</sub> (Fura-red) |                       | PtdIns(4,5)P <sub>2</sub> (PH-GFP) |                       |                        |                     |                    |
|-------------------------------|---------------------------------------------|-----------------------|------------------------------------|-----------------------|------------------------|---------------------|--------------------|
|                               | ΔF/F                                        | Rate ×10 <sup>3</sup> | ΔPM/C (peak)                       | Rate ×10 <sup>3</sup> | ΔPM/C (end)            | Delay (starts)      | Delay (peaks)      |
| Control (n=9)                 | 0.55±0.03                                   | 12.3±0.8              | 0.24±0.02                          | 8.9±2.5               | 0.27±0.06              | 58±6                | 31±9               |
| Wortmannin (n=8)              | 0.54±0.04                                   | 13.4±1.3              | 0.09±0.03 <sup>†</sup>             | 2.1±1.4*              | 0.02±0.03 <sup>†</sup> | 80±10               | 26±3               |
| BAPTA-AM (n=15)               | 0.53±0.02                                   | 8.9±1.0*              | 0.15±0.02*                         | 1.9±0.4 <sup>†</sup>  | 0.04±0.02 <sup>†</sup> | 113±12 <sup>†</sup> | ND                 |
| Caged-InsP <sub>3</sub> (n=8) | 0.51±0.03                                   | 41.3±8.4 <sup>†</sup> | 0.19±0.03                          | 2.3±0.2*              | 0.18±0.03              | 20±8 <sup>†</sup>   | 86±13 <sup>†</sup> |
| Jasplakinolide (n=6)          | 0.52±0.05                                   | 11.0±1.1              | 0.15±0.04                          | 7.1±2.2               | 0.01±0.01 <sup>†</sup> | 77±6 <sup>‡</sup>   | 6±3* <sup>‡</sup>  |
| BoNT/A (n=9)                  | 0.57±0.02                                   | 14.0±1.3              | ND                                 | 3.0±0.6*              | 0.28±0.03              | 72±11               | ND                 |

Changes in Fura-red and GFP fluorescence were measured for each experimental condition. Parameters are given for the first Ca<sup>2+</sup> transient and the first rise in PtdIns(4,5)P<sub>2</sub> triggered at fertilization. The amplitude (in arbitrary units) and maximal rate of rise (in arbitrary units.s<sup>-1</sup>) were measured for the first peak in [Ca<sup>2+</sup>]<sub>i</sub> (ΔF/F) and the first peak in PM/C [ΔPM/C (peak)]. The amplitude of the change in PM/C was also measured after termination of the first Ca<sup>2+</sup> transient (as indicated in Fig. 2) in order to give an estimation of the duration of the rise in PtdIns(4,5)P<sub>2</sub>. Delay (starts/peaks) indicates the delay, in seconds, separating the onset or first peak of the rise in PtdIns(4,5)P<sub>2</sub> from the onset or first peak of the rise in [Ca<sup>2+</sup>]<sub>i</sub>, respectively. Caged-InsP<sub>3</sub> data refer to experiments conducted with 0.5% UV intensity. Data are mean±s.e.m. ND, not determined.

\*P<0.05.

<sup>†</sup>P<0.01.

<sup>‡</sup>n=5.

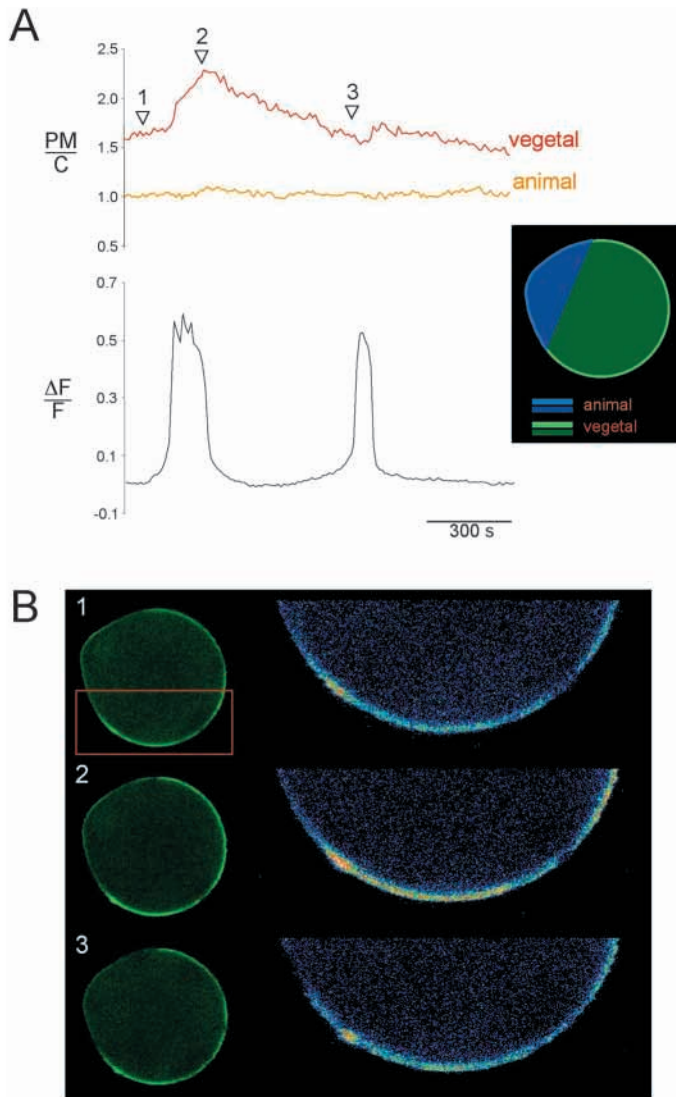

**Fig. 3.** The increase in PtdIns(4,5) $P_2$  is polarized to the vegetal pole. (A) Changes in  $[Ca^{2+}]_i$  and PH-GFP distribution at fertilization in an egg in which the confocal slice was taken through both the animal and vegetal poles. Drawing on right illustrates the regions selected for measurements of PM and C fluorescence in the animal (dark/light blue) and vegetal (dark/light green) poles. Changes in PM/C in the vegetal and animal poles are illustrated by a red or orange trace, respectively. For abbreviations, see Fig. 2 legend. (B) GFP images corresponding to selective time points (arrowheads numbered 1-3 in A) for the experiment described in A. The lower region of the egg (red box) was expanded and displayed in pseudocolor to show more clearly the changes in fluorescence intensity.

the increase in PtdIns(4,5) $P_2$  at fertilization is spatially and temporally organized.

#### An increase in $[Ca^{2+}]_i$ is necessary and sufficient for the increase in PtdIns(4,5) $P_2$

The close association between the increases in  $[Ca^{2+}]_i$  and PtdIns(4,5) $P_2$  raises the question whether  $Ca^{2+}$  is necessary and sufficient for the stimulation of PtdIns(4,5) $P_2$  synthesis. To investigate whether an increase in  $[Ca^{2+}]_i$  is necessary, we used

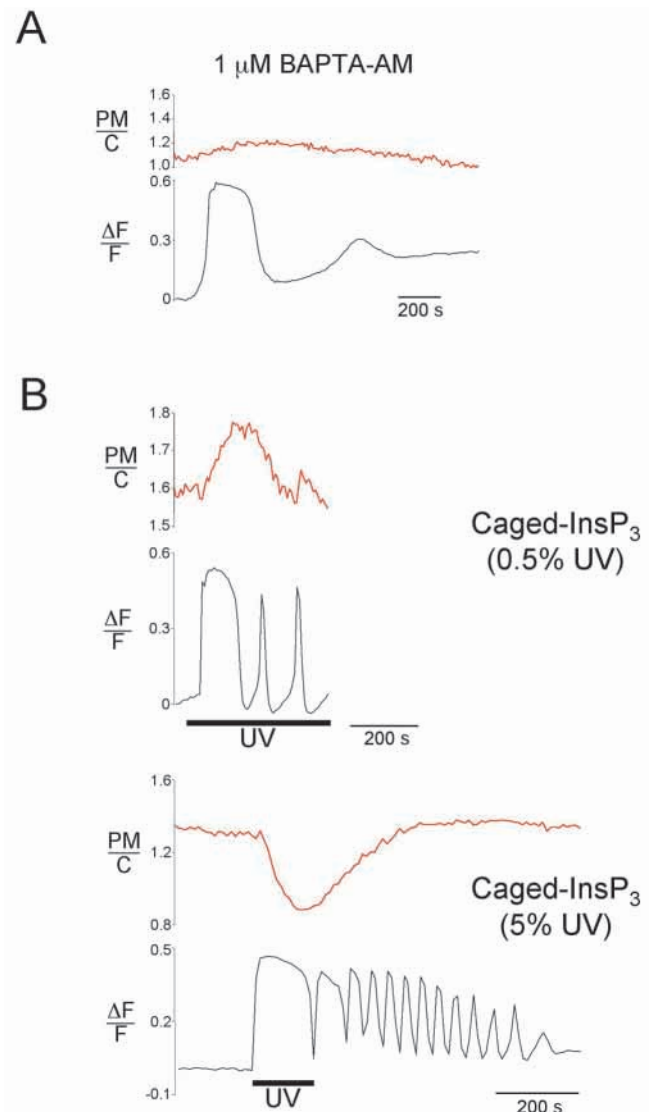

**Fig. 4.** PtdIns(4,5) $P_2$  synthesis at fertilization is  $Ca^{2+}$ -dependent. (A) Changes in  $[Ca^{2+}]_i$  and PH-GFP distribution recorded at fertilization in an egg pretreated with 1  $\mu$ M BAPTA-AM. Similar results were obtained in 15 eggs. (B) Upper panel, changes in  $[Ca^{2+}]_i$  and PH-GFP distribution elicited by uncaging Ins(1,4,5) $P_3$  using a low UV power (0.5% excitation-indicated by the horizontal bar). Similar results were obtained in eight eggs. Lower panel, changes in  $[Ca^{2+}]_i$  and PH-GFP distribution elicited by uncaging Ins(1,4,5) $P_3$  using a tenfold higher UV power (5% excitation-indicated by the horizontal bar). Similar results were obtained in five eggs. For abbreviations, see Fig. 2 legend.

BAPTA to buffer changes in  $[Ca^{2+}]_i$ . In eggs preincubated with 10  $\mu$ M BAPTA-AM for 15 minutes, fertilization-induced increases in  $[Ca^{2+}]_i$  and PtdIns(4,5) $P_2$  were completely abolished (not shown;  $n=10$ ). Further, slowing the kinetics of  $Ca^{2+}$  release by using lower concentrations of BAPTA-AM (1  $\mu$ M, 15 minutes) strongly attenuated the increase in PtdIns(4,5) $P_2$  (Fig. 4A; Table 1). These experiments suggest a requirement for rapid changes in  $[Ca^{2+}]_i$  to induce the increase in PtdIns(4,5) $P_2$  at fertilization.

To examine whether the  $Ca^{2+}$  increase is sufficient to

stimulate PtdIns(4,5) $P_2$  synthesis, we generated Ca<sup>2+</sup> transients in unfertilized MII oocytes by UV-uncaging of Ins(1,4,5) $P_3$ . Uncaging low levels of Ins(1,4,5) $P_3$  continuously by using a UV laser attenuated to 0.5% of maximum power, generated Ca<sup>2+</sup> transients similar to those seen at fertilization (Fig. 4B, upper panel). During the first Ins(1,4,5) $P_3$ -induced Ca<sup>2+</sup> transient, translocation of PH-GFP to the plasma membrane was observed, although at a significantly slower rate than seen at fertilization (Fig. 4B, upper panel; Table 1). The ability to drive an increase in PtdIns(4,5) $P_2$  by triggering Ins(1,4,5) $P_3$ -induced Ca<sup>2+</sup> release suggests a Ca<sup>2+</sup>-dependent process is controlling the increase in PtdIns(4,5) $P_2$  at fertilization. The slower rate of rise indicates that fertilization provides a more effective stimulus for PtdIns(4,5) $P_2$  synthesis, perhaps by invoking additional signaling pathways.

#### PH-GFP reports PtdIns(4,5) $P_2$ rather than Ins(1,4,5) $P_3$ in mouse eggs

PH-GFP has a high affinity for Ins(1,4,5) $P_3$  and has previously been used as an Ins(1,4,5) $P_3$  reporter (Lemmon et al., 1995; Hirose et al., 1999; Nash et al., 2001). However, the increase in plasma membrane PH-GFP fluorescence detected at fertilization suggests that PH-GFP is reporting PtdIns(4,5) $P_2$  and not being influenced by fertilization-induced increases in Ins(1,4,5) $P_3$ . To determine whether high levels of Ins(1,4,5) $P_3$  may compete with PtdIns(4,5) $P_2$  for binding PH-GFP, we released excess Ins(1,4,5) $P_3$  using a tenfold higher UV laser intensity (attenuated to 5% of maximum power). The results show that excess Ins(1,4,5) $P_3$  causes reversible translocation of PH-GFP from the plasma membrane to the cytoplasm (Fig. 4B, lower panel). This suggests that PH-GFP can report changes in Ins(1,4,5) $P_3$  but, in mouse eggs, with a relatively low surface area-to-volume ratio, the concentration of Ins(1,4,5) $P_3$  generated at fertilization is not sufficient to displace PH-GFP from the plasma membrane. This data, consistent with a previous report (van der Wal et al., 2001), further validates our use of this probe as an indicator of plasma membrane PtdIns(4,5) $P_2$ .

#### The increase in PtdIns(4,5) $P_2$ is a result of exocytosis

We have demonstrated that Ca<sup>2+</sup> is necessary and sufficient for the increase in PtdIns(4,5) $P_2$ , but how Ca<sup>2+</sup> stimulates this increase is not known. A number of observations point to an association with cortical granule exocytosis (CGE). First, the Ca<sup>2+</sup> requirement for both processes is similar; second, cortical granules are located in the vegetal pole, which is consistent with polarized PtdIns(4,5) $P_2$  synthesis; and third, the transient nature of the PtdIns(4,5) $P_2$  increase is consistent with the kinetics of exocytosis in mammalian eggs (Kline and Stewart-Savage, 1994). The relationship between PtdIns(4,5) $P_2$  synthesis and exocytosis was investigated using actin filament-targeting drugs known to inhibit CGE (Terada et al., 2000; Abbott and Ducibella, 2001). In preliminary experiments, we noticed that the fertilization-associated rise in PtdIns(4,5) $P_2$  was inhibited by cytochalasin B ( $n=5$ ; not shown). The possibility that actin filament disassembly by cytochalasin B may interfere with localization of some elements of the PtdIns(4,5) $P_2$  synthesis pathway prompted us to investigate the effects of the actin filaments-stabilizing reagent jasplakinolide.

Jasplakinolide has recently been shown to inhibit exocytosis in fertilized mouse eggs (Terada et al., 2000), a finding we confirmed by monitoring CGE with lectin staining (Fig. 5D). Exocytosis was found to occur in only 15% (6/39) of fertilized eggs treated with jasplakinolide (100 nM), compared with 85% of fertilized control eggs. In eggs treated with jasplakinolide (100 nM) normal Ca<sup>2+</sup> oscillations were generated; however, the duration of the rise in PtdIns(4,5) $P_2$  was reduced to a small short-lived transient that finished well before the first Ca<sup>2+</sup> transient returned to baseline (Table 1; Fig. 5A). Changes in PH-GFP localization were never observed for the subsequent Ca<sup>2+</sup> transients, and one egg displayed no change in PH-GFP (not shown).

To interfere more specifically with exocytosis, eggs were injected with the catalytically active light chain of Botulinum neurotoxin A (BoNT/A-LC; 5  $\mu$ M). This toxin cleaves SNAP-25, which is a plasma membrane protein essential for Ca<sup>2+</sup>-dependent exocytosis (Xu et al., 1998) (for a review, see Schiavo et al., 2000). In secretory cells, cleavage of SNAP-25 by BoNT/A slows the kinetics of the Ca<sup>2+</sup>-triggered exocytic burst (Xu et al., 1998; Schiavo et al., 2000). BoNT/A also cleaves SNAP-25 and inhibits exocytosis in mouse eggs (Ikebuchi et al., 1998). In our hands exocytosis was detected in 47% (16/34) of fertilized eggs previously injected with BoNT/A-LC compared with 85% of controls, which indicates a partial inhibition of exocytosis. To examine the effect of this inhibition on PtdIns(4,5) $P_2$  synthesis, BoNT/A-LC was injected into eggs expressing PH-GFP. At fertilization, Ca<sup>2+</sup> transients were similar to controls but the rate of rise of PtdIns(4,5) $P_2$  was threefold slower than controls and no obvious peak was detectable (Table 1; Fig. 5B). Together, these data show that interfering with exocytosis prevents the full development of the rise in plasma membrane PtdIns(4,5) $P_2$  (c.f. Fig. 5C).

#### The increase in PtdIns(4,5) $P_2$ is not stimulated at fertilization of immature oocytes

At fertilization of immature oocytes it is known that Ca<sup>2+</sup> oscillations are attenuated (Fujiwara et al., 1993; Mehlmann and Kline, 1994) (for a review, see Carroll et al., 1996) and that they do not have the capacity to undergo Ca<sup>2+</sup>-activated exocytosis (Abbott and Ducibella, 2001). Therefore, it was of interest to examine the PtdIns(4,5) $P_2$  dynamics in immature oocytes. PH-GFP fluorescence was distributed evenly around the plasma membrane (Fig. 6A). At fertilization, Ca<sup>2+</sup> transients in immature oocytes were smaller and did not persist for as long as those seen in mature eggs (Fig. 6B). During these increases in [Ca<sup>2+</sup>]<sub>i</sub>, there were no detectable changes in the distribution of PH-GFP (Fig. 6B). This finding is consistent with exocytosis being required for the increase in PtdIns(4,5) $P_2$ , although other developmental events may also be required.

#### Micromolar wortmannin inhibits the PtdIns(4,5) $P_2$ increase but not exocytosis

The increase in PH-GFP staining at fertilization may be a result of PtdIns(4,5) $P_2$  synthesis or an increase in PtdIns(4,5) $P_2$  available for binding to PH-GFP. To investigate the possibility that exocytosis increases PtdIns(4,5) $P_2$  synthesis we have pre-

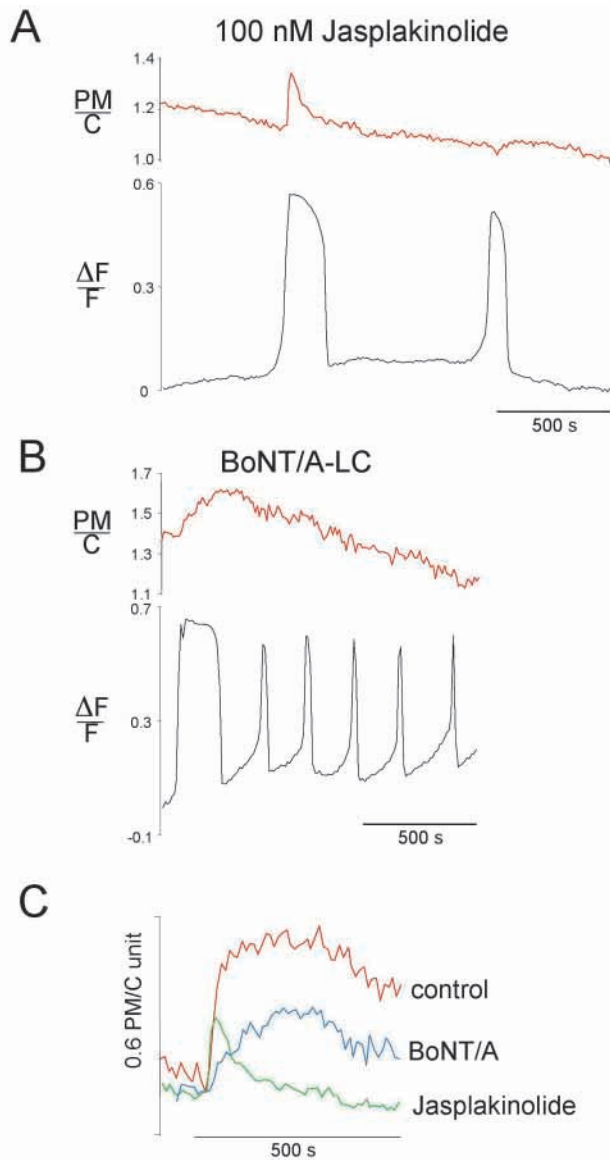

**Fig. 2 legend.** (D) FITC-LCA labelling on (i) unfertilized MII oocyte; (ii) control fertilized egg; and (iii) jasplakinolide (100 nM)-treated fertilized egg. For each condition, the equatorial plane (left) and another focal plane close to the surface (right) of the same cell are displayed. Note the incomplete ring of fluorescence in the equatorial planes, illustrating the cortical granule-free domain in the animal pole. Exocytosis is indicated by an increased fluorescence in the equatorial plane and by a punctate fluorescence in the section close to the surface. Similar patterns of staining were observed in at least 20 cells, for each condition.

treated the oocytes with micromolar wortmannin (30  $\mu$ M, 15 minutes), which inhibits the type III PtdIns 4-kinase (Downing et al., 1996). Treatment with wortmannin abolished the translocation of PH-GFP to the plasma membrane in all eggs examined (Fig. 7A). In four out of eight eggs, small downward inflections in the PM/C ratio were evident, suggesting that a limited hydrolysis of PtdIns(4,5) $P_2$  was revealed when synthesis was inhibited (Fig. 7A; Table 1). These effects were not due to inhibition of PtdIns 3-kinase, as a low concentration of wortmannin (100 nM) had no effect on PtdIns(4,5) $P_2$  synthesis ( $n=3$ , not shown).

Finally, since PtdIns(4,5) $P_2$  has been suggested to be necessary for exocytosis (Martin, 1998; Martin, 2001; Holz et al., 2000; Cremona and De Camilli, 2001), we inhibited the PtdIns(4,5) $P_2$  increase with wortmannin and examined the

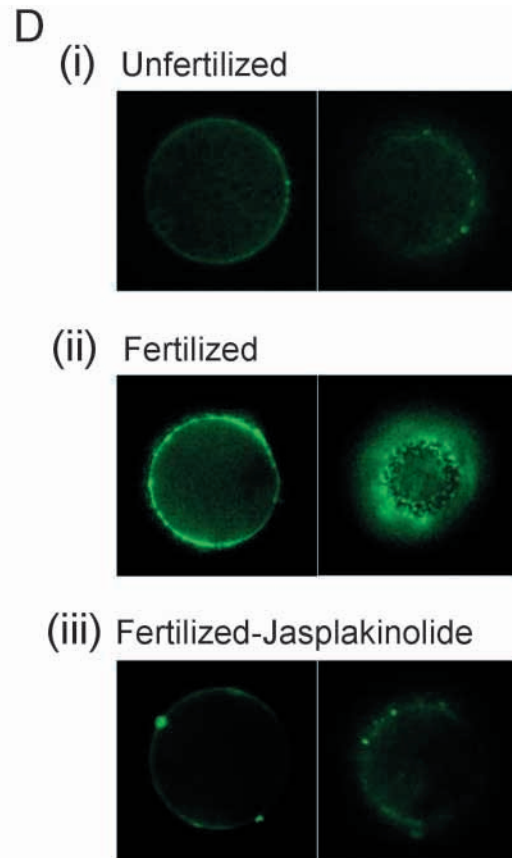

**Fig. 5.** PtdIns(4,5) $P_2$  synthesis is a consequence of exocytosis. (A) Changes in  $[Ca^{2+}]_i$  and PH-GFP distribution at fertilization in an egg treated with 100 nM jasplakinolide. Similar results were obtained in six eggs. (B) Changes in  $[Ca^{2+}]_i$  and PH-GFP distribution at fertilization in an egg injected with 5  $\mu$ M BoNT/A-LC. Similar results were obtained in nine eggs. (C) To illustrate the effect of jasplakinolide and BoNT/A on the kinetics of the rise in PtdIns(4,5) $P_2$ , the traces obtained in the control experiment shown in Fig. 1C (red trace), and in the two experiments described above (green, jasplakinolide; blue, BoNT/A-LC) were aligned according to the first peak in  $[Ca^{2+}]_i$  and superimposed. For abbreviations, see

effect on exocytosis using lectin staining. The data show that wortmannin-treated eggs and controls fertilized in the absence of wortmannin display a similar staining pattern. Thus wortmannin had no effect on the exocytosis of cortical granules [80% eggs labeled (37/46); Fig. 7B] suggesting that the increase in PtdIns(4,5) $P_2$  seen at fertilization is not necessary for the fusion of cortical granules.

### Discussion

Using a fluorescent fusion protein that binds selectively to PtdIns(4,5) $P_2$ , we have investigated PtdIns(4,5) $P_2$  distribution and dynamics at fertilization in mouse eggs. We found that PH-GFP labeled plasma membrane PtdIns(4,5) $P_2$ . Fertilization did not lead to a detectable loss of PtdIns(4,5) $P_2$  but rather a  $Ca^{2+}$ -

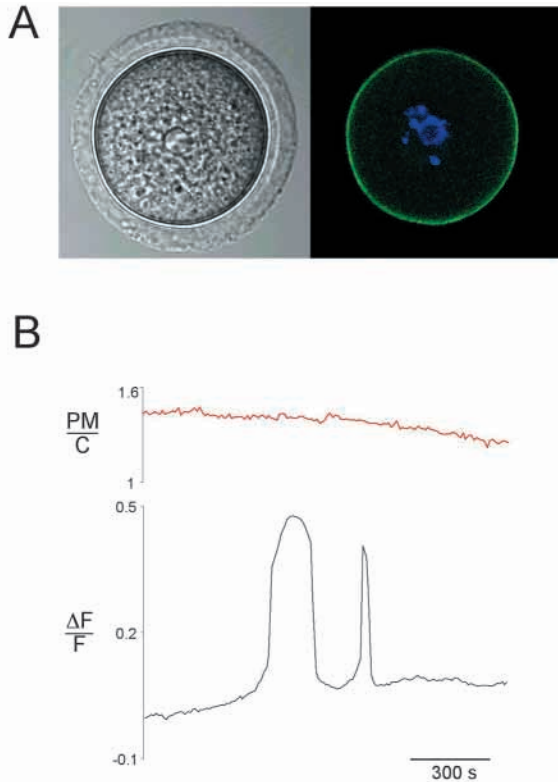

**Fig. 6.** Fertilization of GV-stage oocytes does not trigger the increase in PtdIns(4,5) $P_2$ . (A) Confocal images of PH-GFP labeling in a GV-stage oocyte. DNA is stained with Hoechst 33342. The corresponding bright field image is displayed on the left. (B) Changes in  $[Ca^{2+}]_i$  and PH-GFP distribution at fertilization of a GV stage oocyte. Similar results were obtained in 4 oocytes. For abbreviations, see Fig. 2 legend.

dependent, increase in PtdIns(4,5) $P_2$ . This increase was polarized to the vegetal pole, dependent upon exocytosis of cortical granules, and prevented by inhibiting PtdIns 4-kinase. These studies have implications for the mechanism of  $Ca^{2+}$  signaling and the role of PtdIns(4,5) $P_2$  at fertilization in mammals.

#### PH-GFP monitors plasma membrane PtdIns(4,5) $P_2$ in mouse eggs

The PH-GFP chimera selectively labeled the cortex of the eggs, suggesting that it bound to the plasma membrane-associated pool of PtdIns(4,5) $P_2$ , in agreement with previous studies (Stauffer et al., 1998; Varnai and Balla, 1998; Holz et al., 2000; Micheva et al., 2001). In fertilized eggs expressing PH-GFP,  $Ca^{2+}$  oscillations and CGE were similar to that seen in control eggs, which suggests that expression of the exogenous protein did not interfere with the physiological process of egg activation or CGE. This is consistent with the finding that PH-GFP binding to plasma membrane PtdIns(4,5) $P_2$  is a dynamic process with on-off rates in the order of seconds, allowing PtdIns(4,5) $P_2$  to remain available for binding other proteins, such as PLC (Van der Wal et al., 2001). Together, these data demonstrate that PH-GFP can be used to monitor PtdIns(4,5) $P_2$  dynamics in the plasma membrane of mouse eggs.

PH-GFP provided a reliable marker for the polarity of the

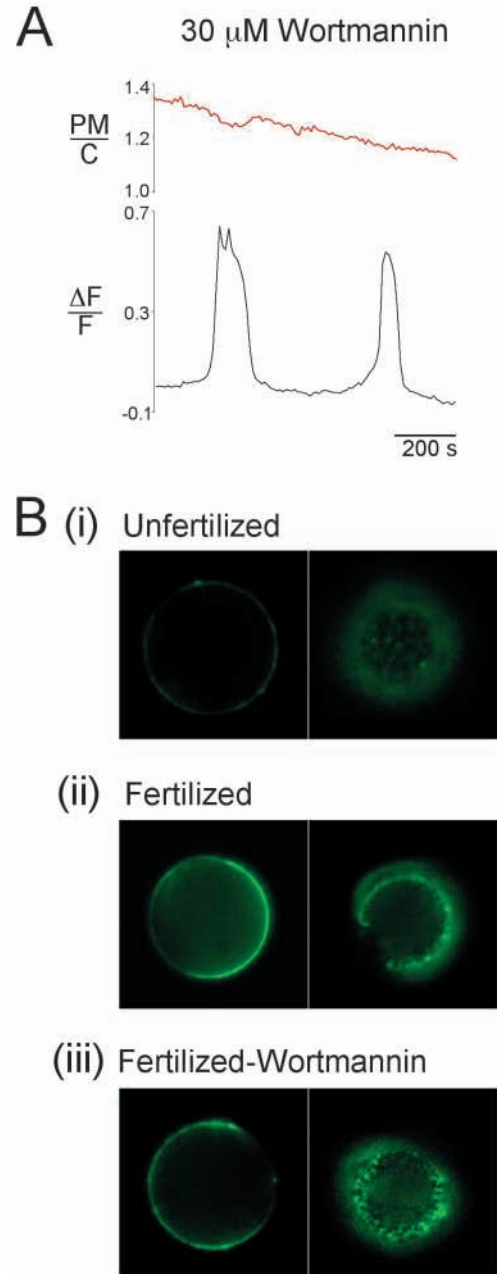

**Fig. 7.** Micromolar wortmannin inhibits the PtdIns(4,5) $P_2$  increase but not exocytosis. (A) Fertilization-induced changes in  $[Ca^{2+}]_i$  and PH-GFP distribution recorded in an egg pre-treated with 30  $\mu$ M wortmannin for 15 minutes. Similar results were obtained in eight eggs. For abbreviations, see Fig. 2 legend. (B) FITC-LCA labeling on (i) unfertilized MII oocyte; (ii) control fertilized egg; and (iii) wortmannin (30  $\mu$ M, 15 minutes)-treated fertilized egg. See Fig. 5D legend for details on FITC-LCA labeling. Similar patterns of staining were observed in at least 12 cells, for each condition.

egg, with a reduced staining in the animal pole. This appears to reflect the absence of microvilli in this region, which effectively reduces the amount of plasma membrane available for PH-GFP labeling. This conclusion is supported by observations that a plasma membrane marker FM 1-43 also shows a decreased staining in the animal pole (G.H. and J.C., unpublished). In addition, immature oocytes that are not



polarized and have microvilli over the entire plasma membrane stain evenly with PH-GFP. Our observations of PH-GFP distribution provide no evidence for PtdIns(4,5) $P_2$  on intracellular membranes, although it is possible that intracellular pools of PtdIns(4,5) $P_2$  are not accessible to PH-GFP (Balla et al., 2000). Interestingly, eggs from *Xenopus* and sea urchin have PtdIns(4,5) $P_2$  in abundance in intracellular membranes (Snow et al., 1996; Rice et al., 2000). It remains to be determined whether mammalian oocytes also have stores of PtdIns(4,5) $P_2$  in intracellular membranes.

#### The dynamics of PtdIns(4,5) $P_2$ at fertilization: the implications for signal transduction at fertilization

Imaging PH-GFP in single living oocytes during the latent period and the first few  $Ca^{2+}$  waves did not reveal any loss of plasma membrane PtdIns(4,5) $P_2$ . In fact the only detectable change in plasma membrane PtdIns(4,5) $P_2$  was an increase that follows the first  $Ca^{2+}$  transient. This may seem surprising given the requirement for PtdIns(4,5) $P_2$  hydrolysis for Ins(1,4,5) $P_3$  production but it is consistent with biochemical assays on populations of sea urchin and *Xenopus* eggs (Turner et al., 1984; Ciapa et al., 1992; Snow et al., 1996). In sea urchins, kinetic studies on PPI turnover have shown that the net increase in PtdIns(4,5) $P_2$  represents a small difference in a very large increase in PPI turnover at fertilization (Ciapa et al., 1992). This suggests that hydrolysis and synthesis are tightly coupled such that hydrolysis is compensated for, or independently stimulated, at fertilization of sea urchin eggs. Our experiments cannot inform on the rate of PPI turnover but do provide the advantages that PtdIns(4,5) $P_2$  dynamics can be monitored simultaneously with  $Ca^{2+}$  in single eggs at a relatively high temporal and spatial resolution. Thus we can be confident that any fast changes just prior to or during the  $Ca^{2+}$  transient will not go undetected due to the averaging effect of slight differences in timing in a population of eggs.

The lack of any detectable loss of plasma membrane PtdIns(4,5) $P_2$  suggests two main models for Ins(1,4,5) $P_3$  production at fertilization in mammals. The first involves plasma membrane PtdIns(4,5) $P_2$  hydrolysis that is rapidly compensated for by synthesis, as described above. Our data also suggests that the hydrolysis of plasma membrane PtdIns(4,5) $P_2$  may be small, compared with the large PPI turnover seen in sea urchins (Ciapa et al., 1992). Inhibition of type III PtdIns 4-kinase with wortmannin revealed only a limited and transient loss of PH-GFP from the plasma membrane in about half the eggs examined. Thus, shifting the balance from synthesis to hydrolysis, failed to reveal any significant loss of PtdIns(4,5) $P_2$  from the plasma membrane, which suggests limited PtdIns(4,5) $P_2$  hydrolysis. However, it is not known to what extent the wortmannin-sensitive PtdIns 4-kinase contribute and it is likely that PtdIns(4,5) $P_2$  is also produced via wortmannin-insensitive pathways. A limited hydrolysis of PtdIns(4,5) $P_2$  is also supported by the finding that low tonic levels of Ins(1,4,5) $P_3$ , rather than larger repetitive spikes of Ins(1,4,5) $P_3$ , provide the best mimic for fertilization-induced  $Ca^{2+}$  transients in mouse eggs [(Jones and Nixon, 2000) and this study]. In addition, we have shown that photoreleasing 20-50  $\mu$ M Ins(1,4,5) $P_3$  can lead to the loss of PH-GFP from the plasma membrane. This is consistent with the 10-100  $\mu$ M Ins(1,4,5) $P_3$  required to displace PH-GFP in somatic cells (van der Wal et

al., 2001) and provides an upper limit on the amount of Ins(1,4,5) $P_3$  generated at fertilization in mammals. Species differences in the mechanism of sperm-induced Ins(1,4,5) $P_3$  production may explain the proposed difference in the extent of PPI turnover in mammals and sea urchins. In mammals, a sperm-derived PLC is thought to be responsible for hydrolysing PtdIns(4,5) $P_2$  (Jones et al., 2000) (for a review, see Carroll, 2001) while in sea urchins it is thought that the sperm activates egg PLCs (Carroll et al., 1997; Shearer et al., 1999; Jaffe et al., 2001). This additional amplification step in the signaling pathway may lead to a high rate of PtdIns(4,5) $P_2$  hydrolysis in sea urchin eggs compared with that provided by PLCs derived from a single sperm in mammals.

The second model suggests that plasma membrane PtdIns(4,5) $P_2$  is not the major source of PtdIns(4,5) $P_2$  used for Ins(1,4,5) $P_3$  production at fertilization. In our studies we are addressing only plasma membrane PtdIns(4,5) $P_2$  (as discussed above), whereas in sea urchins the experiments measure total cellular PtdIns(4,5) $P_2$ . PtdIns(4,5) $P_2$  on intracellular membranes has been reported in *Xenopus* and sea urchin eggs (Snow et al., 1996; Rice et al., 2000). It has not been demonstrated that such intracellular pools of PtdIns(4,5) $P_2$  participate in  $Ca^{2+}$  signaling but intracellular pools of PtdIns(4,5) $P_2$  may be a specialization required for large eggs where a  $Ca^{2+}$  wave propagates through a large cytoplasmic volume (Fontanilla and Nuccitelli, 1998; Carroll et al., 1994; Deguchi et al., 2000). Hydrolysis of PtdIns(4,5) $P_2$  on intracellular membranes by  $Ca^{2+}$ -dependent PLC (Swann and Whitaker, 1986; Meyer and Stryer, 1988), which has been suggested to be provided by the fertilizing sperm (Rice et al., 2000), would provide Ins(1,4,5) $P_3$  at the wave-front to sustain  $Ca^{2+}$  release tens or hundreds of microns from the plasma membrane. Such a role for intracellular PtdIns(4,5) $P_2$  remains to be demonstrated but, at fertilization, where PLC is not thought to be activated at the plasma membrane by a conventional receptor-coupled mechanism, it remains a good possibility.

#### The increase in PtdIns(4,5) $P_2$ is $Ca^{2+}$ -dependent and related to cortical granule exocytosis

Our data show that increases in plasma membrane PtdIns(4,5) $P_2$  always outstrip any hydrolysis at fertilization. This increase is strictly  $Ca^{2+}$  dependent such that a  $Ca^{2+}$  increase is both necessary and sufficient for the increase in PtdIns(4,5) $P_2$ . The more rapid kinetics of the increase at fertilization compared with that of Ins(1,4,5) $P_3$  suggests that the fertilization  $Ca^{2+}$  transient is more effective or that the sperm activates additional signaling pathways; protein kinase C is one obvious possibility. Whatever the sperm does that stimulates the increase it is short-lived, as the majority of the synthesis takes place during the first  $Ca^{2+}$  transient.

One short-lived  $Ca^{2+}$ -dependent event at fertilization is the exocytosis of cortical granules (Kline and Kline, 1992; Kline and Stewart-Savage, 1994). A strong connection between PtdIns(4,5) $P_2$  synthesis at fertilization and  $Ca^{2+}$ -triggered CGE is suggested using agents that inhibit exocytosis. Three different agents that inhibit CGE in different ways, inhibit the increase in PtdIns(4,5) $P_2$  at fertilization while having no effects on  $Ca^{2+}$  signalling. Jasplakinolide and cytochalasin B prevent depolymerization and polymerization of actin, respectively, both of which inhibit exocytosis in a number of systems, including

eggs (Terada et al., 2000; Abbott and Ducibella, 2001). The third agent, BoNT/A, cleaves SNAP-25, a plasma membrane protein that is important for  $\text{Ca}^{2+}$ -activated exocytosis. BoNT/A strongly decreased the rate of rise of  $\text{PtdIns}(4,5)\text{P}_2$ , which is consistent with its ability to slow down and partially inhibit the exocytotic burst (Xu et al., 1998) (for a review, see Schiavo et al., 2000). The connection between exocytosis and the increase in  $\text{PtdIns}(4,5)\text{P}_2$  is also supported by a number of indirect observations. First, both events have a similar  $\text{Ca}^{2+}$  dependence;  $\text{Ins}(1,4,5)\text{P}_3$  stimulates both events (Lee et al., 1988; Xu et al., 1994; Abbott and Ducibella, 2001; present study) while  $1 \mu\text{M}$  BAPTA-AM is inhibitory [(Kline and Kline, 1992) (present study)]. Second, the main burst of cortical granule exocytosis is stimulated by the first  $\text{Ca}^{2+}$  transient (Kline and Stewart-Savage, 1994), which is also responsible for the increase in  $\text{PtdIns}(4,5)\text{P}_2$  (present study). Third, in situations where there is no  $\text{Ca}^{2+}$ -stimulated exocytosis (GV stage oocytes and the animal pole of MII eggs) there is no increase in  $\text{PtdIns}(4,5)\text{P}_2$ . Together, the  $\text{Ca}^{2+}$ -dependency, timing, pattern, duration and cortical location of  $\text{PtdIns}(4,5)\text{P}_2$  increases are consistent with an involvement of CGE in the  $\text{PtdIns}(4,5)\text{P}_2$  increase.

The mechanism by which CGE leads to an apparent increase in plasma membrane  $\text{PtdIns}(4,5)\text{P}_2$  is not known. Inhibition of the increase by wortmannin suggests that de novo  $\text{PtdIns}(4,5)\text{P}_2$  synthesis is responsible. This is strengthened by the fact that CGE was not inhibited by wortmannin treatment, suggesting that the  $\text{PtdIns}(4,5)\text{P}_2$  increase was not simply due to an increase in plasma membrane. An alternative explanation is that exocytosis leads to the addition of  $\text{PtdIns}(4,5)\text{P}_2$  to the plasma membrane that was previously unavailable to PH-GFP (Balla et al., 2000). However, the unmasking of such  $\text{PtdIns}(4,5)\text{P}_2$  binding sites would need to be inhibited by wortmannin. Taken together our data suggest that CGE stimulates an increase in plasma membrane  $\text{PtdIns}(4,5)\text{P}_2$ , perhaps by supplying substrate or enzymes that promote  $\text{PtdIns}(4,5)\text{P}_2$  synthesis.

#### A role for the transient increase in plasma membrane $\text{PtdIns}(4,5)\text{P}_2$ at CGE?

Preventing the increase in  $\text{PtdIns}(4,5)\text{P}_2$  with inhibitors of exocytosis did not inhibit the generation of  $\text{Ca}^{2+}$  transients at fertilization. This suggests that the increase is not necessary for sustaining  $\text{PtdIns}(4,5)\text{P}_2$  levels for  $\text{Ins}(1,4,5)\text{P}_3$  production. The increase in plasma membrane  $\text{PtdIns}(4,5)\text{P}_2$  is also not apparently necessary for exocytosis, since wortmannin inhibited the increase in  $\text{PtdIns}(4,5)\text{P}_2$  without any obvious effect on exocytosis. A role for  $\text{PtdIns}(4,5)\text{P}_2$  in the early,  $\text{Ca}^{2+}$ -independent, priming and docking steps of exocytosis has been suggested by studies showing that exocytosis can be recovered in permeabilised cells by providing  $\text{PtdIns}(4)P$  5-kinase during the priming step (Martin, 1998). By monitoring  $\text{Ca}^{2+}$  and  $\text{PtdIns}(4,5)\text{P}_2$  simultaneously, it is clear from our studies that the increase in  $\text{PtdIns}(4,5)\text{P}_2$  is after the  $\text{Ca}^{2+}$  rise. This suggests that the  $\text{PtdIns}(4,5)\text{P}_2$  increase is not necessary for priming, although basal  $\text{PtdIns}(4,5)\text{P}_2$  may be. We suggest that the increase in  $\text{PtdIns}(4,5)\text{P}_2$  is a consequence, rather than a cause of, exocytosis and that the role of the increase is downstream of membrane fusion. Remodelling the actin cytoskeleton (Sechi

and Wehland, 2000) and endocytosis for membrane retrieval after exocytosis are known to occur after fertilization (Kline and Stewart-Savage, 1994; Bement et al., 2000; Smith et al., 2000; Lee et al., 2001) and it is here that  $\text{PtdIns}(4,5)\text{P}_2$  synthesis may play a role.

We thank Giampietro Schiavo (ICRF, London), for providing us with BoNT/A-LC and Shamshad Cockcroft (Department of Physiology, UCL) for helpful discussions through the course of this work. This work was supported by an MRC Career Establishment Grant and by a Wellcome Trust Equipment Grant. Our research is supported by an MRC Cooperative Group Grant and facilitated by the Life Sciences Imaging Consortium (LSIC) at UCL.

#### References

- Abbott, A. L. and Ducibella, T. (2001). Calcium and the control of mammalian cortical granule exocytosis. *Front. Biosci.* **6**, D792-D806.
- Abbott, A. L., Fissore, R. A. and Ducibella, T. (1999). Incompetence of preovulatory mouse oocytes to undergo cortical granule exocytosis following induced calcium oscillations. *Dev. Biol.* **207**, 38-48.
- Balla, T., Bondeva, T. and Varnai, P. (2000). How accurately can we image inositol lipids in living cells? *Trends Pharmacol. Sci.* **21**, 238-241.
- Bement, W. M., Benink, H., Mandato, C. A. and Swelstad, B. B. (2000). Evidence for direct membrane retrieval following cortical granule exocytosis in *Xenopus* oocytes and eggs. *J. Exp. Zool.* **286**, 767-775.
- Berridge M. J. (1993). Inositol trisphosphate and calcium signalling. *Nature* **361**, 315-325.
- Brind, S., Swann, K. and Carroll, J. (2000). Inositol 1,4,5-trisphosphate receptors are downregulated in mouse oocytes in response to sperm or adenophostin A but not to increases in intracellular  $\text{Ca}^{2+}$  or egg activation. *Dev. Biol.* **223**, 251-265.
- Carroll, J. (2001). The initiation and regulation of  $\text{Ca}^{2+}$  signalling at fertilization in mammals. *Semin. Cell Dev. Biol.* **12**, 37-43.
- Carroll, J., Swann, K., Whittingham, D. and Whitaker, M. (1994). Spatiotemporal dynamics of intracellular  $[\text{Ca}^{2+}]_i$  oscillations during the growth and meiotic maturation of mouse oocytes. *Development* **120**, 3507-3517.
- Carroll, J., Jones, K. T. and Whittingham, D. G. (1996).  $\text{Ca}^{2+}$  release and the development of  $\text{Ca}^{2+}$  release mechanisms during oocyte maturation: a prelude to fertilization. *Rev. Reprod.* **1**, 137-143.
- Carroll, D. J., Ramarao, C. S., Mehlmann, L. M., Roche, S., Terasaki, M. and Jaffe, L. A. (1997). Calcium release at fertilization in starfish eggs is mediated by phospholipase C $\gamma$ . *J. Cell Biol.* **138**, 1303-1311.
- Ciapa, B., Borg, B. and Whitaker, M. (1992). Polyphosphoinositide metabolism during the fertilization wave in sea urchin eggs. *Development* **115**, 187-195.
- Cremona, O. and De Camilli, P. (2001). Phosphoinositides in membrane traffic at the synapse. *J. Cell Sci.* **114**, 1041-1052.
- Cuthbertson, K. S. and Cobbold, P. H. (1985). Phorbol ester and sperm activate mouse oocytes by inducing sustained oscillations in cell  $\text{Ca}^{2+}$ . *Nature* **316**, 541-542.
- Deguchi, R., Shirakawa, H., Oda, S., Mohri, T. and Miyazaki, S. (2000). Spatiotemporal analysis of  $\text{Ca}^{2+}$  waves in relation to the sperm entry site and animal-vegetal axis during  $\text{Ca}^{2+}$  oscillations in fertilized mouse eggs. *Dev. Biol.* **218**, 299-313.
- Downing, G. J., Kim, S., Nakanishi, S., Catt, K. J. and Balla, T. (1996). Characterization of a soluble adrenal phosphatidylinositol 4-kinase reveals wortmannin sensitivity of type III phosphatidylinositol kinases. *Biochemistry* **35**, 3587-3594.
- Fontanilla, R. A. and Nuccitelli, R. (1998). Characterization of the sperm-induced calcium wave in *Xenopus* eggs using confocal microscopy. *Biophys. J.* **75**, 2079-2087.
- Fujiwara, T., Nakada, K., Shirakawa, H. and Miyazaki, S. (1993). Development of inositol trisphosphate-induced calcium release mechanism during maturation of hamster oocytes. *Dev. Biol.* **156**, 69-79.
- Fulton, B. P. and Whittingham, D. G. (1978). Activation of mammalian oocytes by intracellular injection of calcium. *Nature* **273**, 149-151.
- Haroontunian, A. T., Kao, J. P., Paranjape, S. and Tsien, R. Y. (1991). Generation of calcium oscillations in fibroblasts by positive feedback between calcium and  $\text{IP}_3$ . *Science* **251**, 75-78.
- Hirose, K., Kadowaki, S., Tanabe, M., Takeshima, H. and Iino, M. (1999).

- Spatiotemporal dynamics of inositol 1,4,5-trisphosphate that underlies complex Ca<sup>2+</sup> mobilization patterns. *Science* **284**, 1527-1530.
- Holz, R. W., Hlubek, M. D., Sorensen, S. D., Fisher, S. K., Balla, T., Ozaki, S., Prestwich, G. D., Stuenkel, E. L. and Bittner M. A.** (2000). A pleckstrin homology domain specific for phosphatidylinositol 4,5-bisphosphate (PtdIns-4,5-P<sub>2</sub>) and fused to green fluorescent protein identifies plasma membrane PtdIns-4,5-P<sub>2</sub> as being important in exocytosis. *J. Biol. Chem.* **275**, 17878-17885.
- Ikebuchi, Y., Masumoto, N., Matsuoka, T., Yokoi, T., Tahara, M., Tasaka, K., Miyake, A. and Murata, Y.** (1998). SNAP-25 is essential for cortical granule exocytosis in mouse eggs. *Am. J. Physiol.* **274**, C1496-C1500.
- Jaffe, L. A., Giusti, A. F., Carroll, D. J. and Foltz, K. R.** (2001). Ca<sup>2+</sup> signalling during fertilization of echinoderm eggs. *Semin. Cell Dev. Biol.* **12**, 45-51.
- Jellerette, T., He, C. L., Wu, H., Parys, J. B. and Fissore, R. A.** (2000). Down-regulation of the inositol 1,4,5-trisphosphate receptor in mouse eggs following fertilization or parthenogenetic activation. *Dev. Biol.* **223**, 238-250.
- Jones, K. T. and Nixon, V. L.** (2000). Sperm-induced Ca<sup>2+</sup> oscillations in mouse oocytes and eggs can be mimicked by photolysis of caged inositol 1,4,5-trisphosphate: evidence to support a continuous low level production of inositol 1,4,5-trisphosphate during mammalian fertilization. *Dev. Biol.* **225**, 1-12.
- Jones, K. T., Soeller, C. and Cannell, M. B.** (1998). The passage of Ca<sup>2+</sup> and fluorescent markers between the sperm and egg after fusion in the mouse. *Development* **125**, 4627-4635.
- Jones, K. T., Matsuda, M., Parrington, J., Katan, M. and Swann K.** (2000). Different Ca<sup>2+</sup>-releasing abilities of sperm extracts compared with tissue extracts and phospholipase C isoforms in sea urchin egg homogenate and mouse eggs. *Biochem. J.* **346**, 743-749.
- Kavran, J. M., Klein, D. E., Lee, A., Falasca, M., Isakoff, S. J., Skolnik, E. Y. and Lemmon, M. A.** (1998). Specificity and promiscuity in phosphoinositide binding by pleckstrin homology domains. *J. Biol. Chem.* **273**, 30497-30508.
- Kline, D. and Kline, J. T.** (1992). Repetitive calcium transients and the role of calcium in exocytosis and cell cycle activation in the mouse egg. *Dev. Biol.* **149**, 80-89.
- Kline, D. and Stewart-Savage, J.** (1994). The timing of cortical granule fusion, content dispersal, and endocytosis during fertilization of the hamster egg: an electrophysiological and histochemical study. *Dev. Biol.* **162**, 277-287.
- Lawrence, Y., Whitaker, M. and Swann, K.** (1997). Sperm-egg fusion is the prelude to the initial Ca<sup>2+</sup> increase at fertilization in the mouse. *Development* **124**, 233-241.
- Lee, S. H., Ahuja, K. K., Gilbert, D. J. and Whittingham, D. G.** (1988). The appearance of glycoconjugates associated with cortical granule release during mouse fertilization. *Development* **102**, 595-604.
- Lee, S. C., Fissore, R. A. and Nuccitelli, R.** (2001). Sperm factor initiates capacitance and conductance changes in mouse eggs that are more similar to fertilization than IP<sub>3</sub>- or Ca<sup>2+</sup>-induced changes. *Dev. Biol.* **232**, 127-148.
- Lemmon, M. A., Ferguson, K. M., O'Brien, R., Sigler, P. B. and Schlessinger, J.** (1995). Specific and high-affinity binding of inositol phosphates to an isolated pleckstrin homology domain. *Proc. Natl. Acad. Sci. USA* **92**, 10472-10476.
- Martin, T. F.** (1998). Phosphoinositide lipids as signaling molecules: common themes for signal transduction, cytoskeletal regulation, and membrane trafficking. *Annu. Rev. Cell Dev. Biol.* **14**, 231-264.
- Martin, T. F.** (2001). PI(4,5)P<sub>2</sub> regulation of surface membrane traffic. *Curr. Opin. Cell Biol.* **13**, 493-499.
- Mehlmann, L. M. and Kline, D.** (1994). Regulation of intracellular calcium in the mouse egg: calcium release in response to sperm or inositol trisphosphate is enhanced after meiotic maturation. *Biol. Reprod.* **51**, 1088-1098.
- Meyer, T. and Stryer, L.** (1988). Molecular model for receptor-stimulated calcium spiking. *Proc. Natl. Acad. Sci. USA* **85**, 5051-5055.
- Micheva, K. D., Holz, R. W. and Smith, S. J.** (2001). Regulation of presynaptic phosphatidylinositol 4,5-bisphosphate by neuronal activity. *J. Cell Biol.* **154**, 355-368.
- Missiaen, L., Taylor, C. W. and Berridge, M. J.** (1991). Spontaneous calcium release from inositol trisphosphate-sensitive calcium stores. *Nature* **352**, 241-244.
- Miyazaki, S., Shirakawa, H., Nakada, K. and Honda, Y.** (1993). Essential role of the inositol 1,4,5-trisphosphate receptor/Ca<sup>2+</sup> release channel in Ca<sup>2+</sup> waves and Ca<sup>2+</sup> oscillations at fertilization of mammalian eggs. *Dev. Biol.* **158**, 62-78.
- Nash, M. S., Young, K. W., John Challiss, R. A. and Nahorski, S. R.** (2001). Receptor-specific messenger oscillations. *Nature* **413**, 381-382.
- Quinn, P., Barros, C. and Whittingham, D. G.** (1982). Preservation of hamster oocytes to assay the fertilizing capacity of human spermatozoa. *J. Reprod. Fertil.* **66**, 161-168.
- Rice, A., Parrington, J., Jones, K. T. and Swann, K.** (2000). Mammalian sperm contain a Ca<sup>2+</sup>-sensitive phospholipase C activity that can generate InsP<sub>3</sub> from PIP<sub>2</sub> associated with intracellular organelles. *Dev. Biol.* **228**, 125-135.
- Sato, Y., Miyazaki, S., Shikano, T., Mitsuhashi, N., Takeuchi, H., Mikoshiba, K. and Kuwabara, Y.** (1998). Adenophostin, a potent agonist of the inositol 1,4,5-trisphosphate receptor, is useful for fertilization of mouse oocytes injected with round spermatids leading to normal offspring. *Biol. Reprod.* **58**, 867-873.
- Schiavo, G., Matteoli, M. and Montecucco, C.** (2000). Neurotoxins affecting neuroexocytosis. *Physiol. Rev.* **80**, 717-766.
- Sechi, A. S. and Wehland, J.** (2000). The actin cytoskeleton and plasma membrane connection: PtdIns(4,5)P<sub>2</sub> influences cytoskeletal protein activity at the plasma membrane. *J. Cell Sci.* **113**, 3685-3695.
- Shearer, J., De Nadai, C., Emily-Fenouil, F., Gache, C., Whitaker, M. and Ciapa, B.** (1999). Role of phospholipase C $\gamma$  at fertilization and during mitosis in sea urchin eggs and embryos. *Development* **126**, 2273-2284.
- Smith, R. M., Baibakov, B., Ikebuchi, Y., White, B. H., Lambert, N. A., Kaczmarek, L. K. and Vogel, S. S.** (2000). Exocytotic insertion of calcium channels constrains compensatory endocytosis to sites of exocytosis. *J. Cell Biol.* **148**, 755-767.
- Snow, P., Yim, D. L., Leibow, J. D., Saini, S. and Nuccitelli, R.** (1996). Fertilization stimulates an increase in inositol trisphosphate and inositol lipid levels in *Xenopus* eggs. *Dev. Biol.* **180**, 108-118.
- Stauffer, T. P., Ahn, S. and Meyer, T.** (1998). Receptor-induced transient reduction in plasma membrane PtdIns(4,5)P<sub>2</sub> concentration monitored in living cells. *Curr. Biol.* **8**, 343-346.
- Stith, B. J., Goalstone, M., Silva, S. and Jaynes, C.** (1993). Inositol 1,4,5-trisphosphate mass changes from fertilization through first cleavage in *Xenopus laevis*. *Mol. Biol. Cell* **4**, 435-443.
- Stith, B. J., Espinoza, R., Roberts, D. and Smart, T.** (1994). Sperm increase inositol 1,4,5-trisphosphate mass in *Xenopus laevis* eggs preinjected with calcium buffers or heparin. *Dev. Biol.* **165**, 206-215.
- Stricker, S. A.** (1999). Comparative biology of calcium signaling during fertilization and egg activation in animals. *Dev. Biol.* **211**, 157-176.
- Subramanian, K. and Meyer, T.** (1997). Calcium-induced restructuring of nuclear envelope and endoplasmic reticulum calcium stores. *Cell* **89**, 963-971.
- Swann, K. and Whitaker, M.** (1986). The part played by inositol trisphosphate and calcium in the propagation of the fertilization wave in sea urchin eggs. *J. Cell Biol.* **103**, 2333-2342.
- Terada, Y., Simerly, C. and Schatten, G.** (2000). Microfilament stabilization by jasplakinolide arrests oocyte maturation, cortical granule exocytosis, sperm incorporation cone resorption, and cell-cycle progression, but not DNA replication, during fertilization in mice. *Mol. Reprod. Dev.* **56**, 89-98.
- Turner, P. R., Sheetz, M. P. and Jaffe, L. A.** (1984). Fertilization increases the polyphosphoinositide content of sea urchin eggs. *Nature* **310**, 414-415.
- Van der Wal, J., Habets, R., Varnai, P., Balla, T. and Jalink, K.** (2001). Monitoring agonist-induced phospholipase C activation in live cells by fluorescence resonance energy transfer. *J. Biol. Chem.* **276**, 15337-15344.
- Varnai, P. and Balla, T.** (1998). Visualization of phosphoinositides that bind pleckstrin homology domains: calcium- and agonist-induced dynamic changes and relationship to myo-[<sup>3</sup>H]inositol-labeled phosphoinositide pools. *J. Cell Biol.* **143**, 501-510.
- Wakui, M., Potter, B. V. and Petersen, O. H.** (1989). Pulsatile intracellular calcium release does not depend on fluctuations in inositol trisphosphate concentration. *Nature* **339**, 317-320.
- Xu, T., Binz, T., Niemann, H. and Neher, E.** (1998). Multiple kinetic components of exocytosis distinguished by neurotoxin sensitivity. *Nat. Neurosci.* **1**, 192-200.
- Xu, Z., Kopf, G. S. and Schultz, R. M.** (1994). Involvement of inositol 1,4,5-trisphosphate-mediated Ca<sup>2+</sup> release in early and late events of mouse egg activation. *Development* **120**, 1851-1859.
